# Supplementary material for: Electroactive chain-like compounds constructed from trimetallic clusters and 4,4′-bipyridine spacers: one-pot synthesis, characterization and surface binding
Source: Royal Society of Chemistry journal article supplement (doi:10.1039/c0dt01237h), 2011-01-01
Supplement: c0dt01237h.pdf [file c0dt01237h.pdf]

## Supplementary information

### Electroactive chain-like compounds constructed from trimetallic clusters and 4,4'-bipyridine spacers: one-pot synthesis, characterization and surface binding

Masaaki Abe,\* Atsushi Inatomi and Yoshio Hisaeda\*

Department of Applied Chemistry, Graduate School of Engineering, Kyushu University, Moto-oka 744, Nishi-ku, Fukuoka 819-0395, Japan.

<sup>1</sup>H NMR data of **1a–4a** and **1b–4b** in CD<sub>3</sub>CN including coupling constants.

Assignments of the resonances are provided in Table 1 of the text.

**1a:** δ 2.01 (s, 12H), 1.88 (s, 6H).

**2a:** δ 9.35 (d, 4H, *J* = 6.3 Hz), 8.69 (d, 4H, *J* = 6.3 Hz), 2.08 (s, 12H), 2.03 (s, 12H), 1.90 (s, 12H).

**3a:** δ 9.41 (d, 4H, *J* = 6.3 Hz), 9.37 (d, 4H, *J* = 6.6 Hz), 8.75 (d, 4H, *J* = 6.6 Hz), 8.71 (d, 4H, *J* = 6.6 Hz), 2.093 (s, 12H), 2.090 (s, 12H), 2.04 (s, 12H), 1.90 (s, 12H + 6H).

**4a:** δ 9.42 (d, 4H, *J* = 6.6 Hz), 9.41 (d, 4H, *J* = 6.3 Hz), 9.36 (d, 4H, *J* = 6.6 Hz), 8.78 (d, 4H, *J* = 6.3 Hz), 8.76 (d, 4H, *J* = 6.6 Hz), 8.72 (d, 4H, *J* = 6.3 Hz), 2.102 (s, 12H), 2.096 (s, 12H), 2.089 (s, 12H), 2.04 (s, 12H), 1.92 (s, 12H), 1.90 (s, 12H).

**1b:** δ 9.27 (d, 4H, *J* = 6.6 Hz), 8.88 (d, 4H, *J* = 6.0 Hz), 8.47 (d, 4H, *J* = 6.6 Hz), 7.98 (d, 4H, *J* = 6.0 Hz), 2.13 (s, 12H), 1.81 (s, 6H).

**2b:** δ 9.41 (d, 4H, *J* = 6.6 Hz), 9.28 (d, 4H, *J* = 6.6 Hz), 8.88 (d, 4H, *J* = 6.0 Hz), 8.76 (d, 4H, *J* = 6.6 Hz), 8.49 (d, 4H, *J* = 6.6 Hz), 7.99 (d, 4H, *J* = 6.0 Hz), 2.08 (s, 12H), 2.04 (s, 12H), 1.86 (s, 12H).

**3b:** δ 9.42 (overlapping signals: d + d, 4H + 4H), 9.28 (d, 4H, *J* = 6.3 Hz), 8.89 (d, 4H, *J* = 5.7 Hz), 8.78 (overlapping signals: d + d, 4H + 4H), 8.49 (d, 4H, *J* = 6.6 Hz), 7.99 (d, 4H, *J* = 6.0 Hz), 2.10 (s, 12H), 2.08 (s, 12H), 2.05 (s, 12H), 1.869 (s, 12H), 1.865 (s, 6H).

**4b:** 9.42 (overlapping signals: d + d + d, 4H + 4H + 4H), 9.28 (d, 4H, *J* = 6.6 Hz), 8.89 (d, 4H, *J* = 5.7 Hz), 8.78 (overlapping signals: d + d + d, 4H + 4H + 4H), 8.49 (d, 4H, *J* = 6.6 Hz), 7.99 (d, 4H, *J* = 5.7 Hz), 2.11 (s, 12H), 2.10 (s, 12H), 2.08 (s, 12H), 2.05 (s, 12H), 1.87 (overlapping signals: s + s, 12H + 12H)

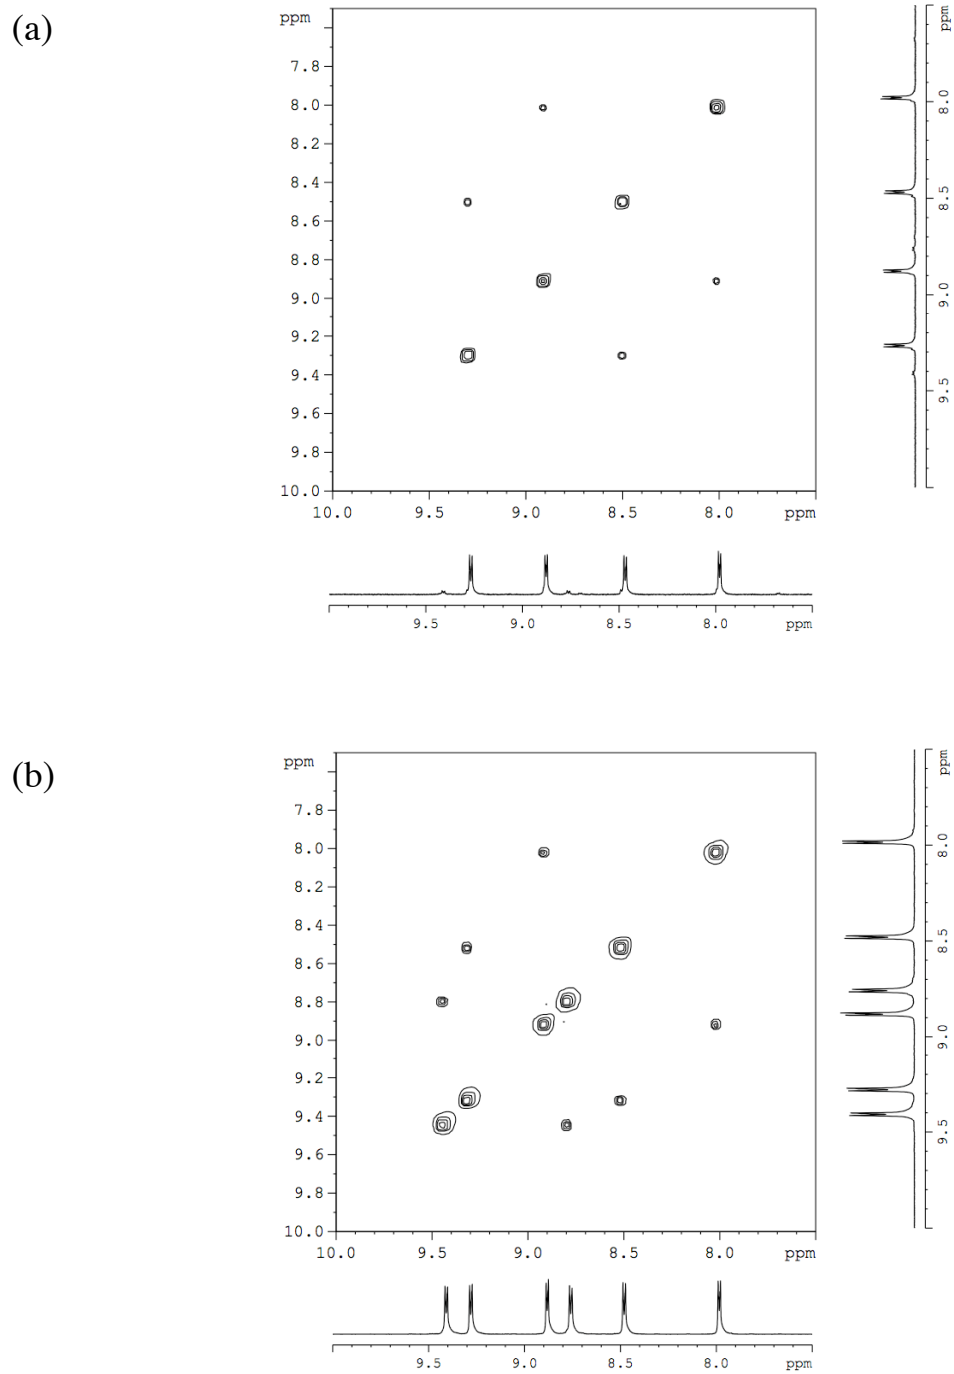

**Fig. S1**  $^1\text{H}$ - $^1\text{H}$  COSY spectra of (a) **1b** and (b) **2b** in  $\text{CD}_3\text{CN}$ .

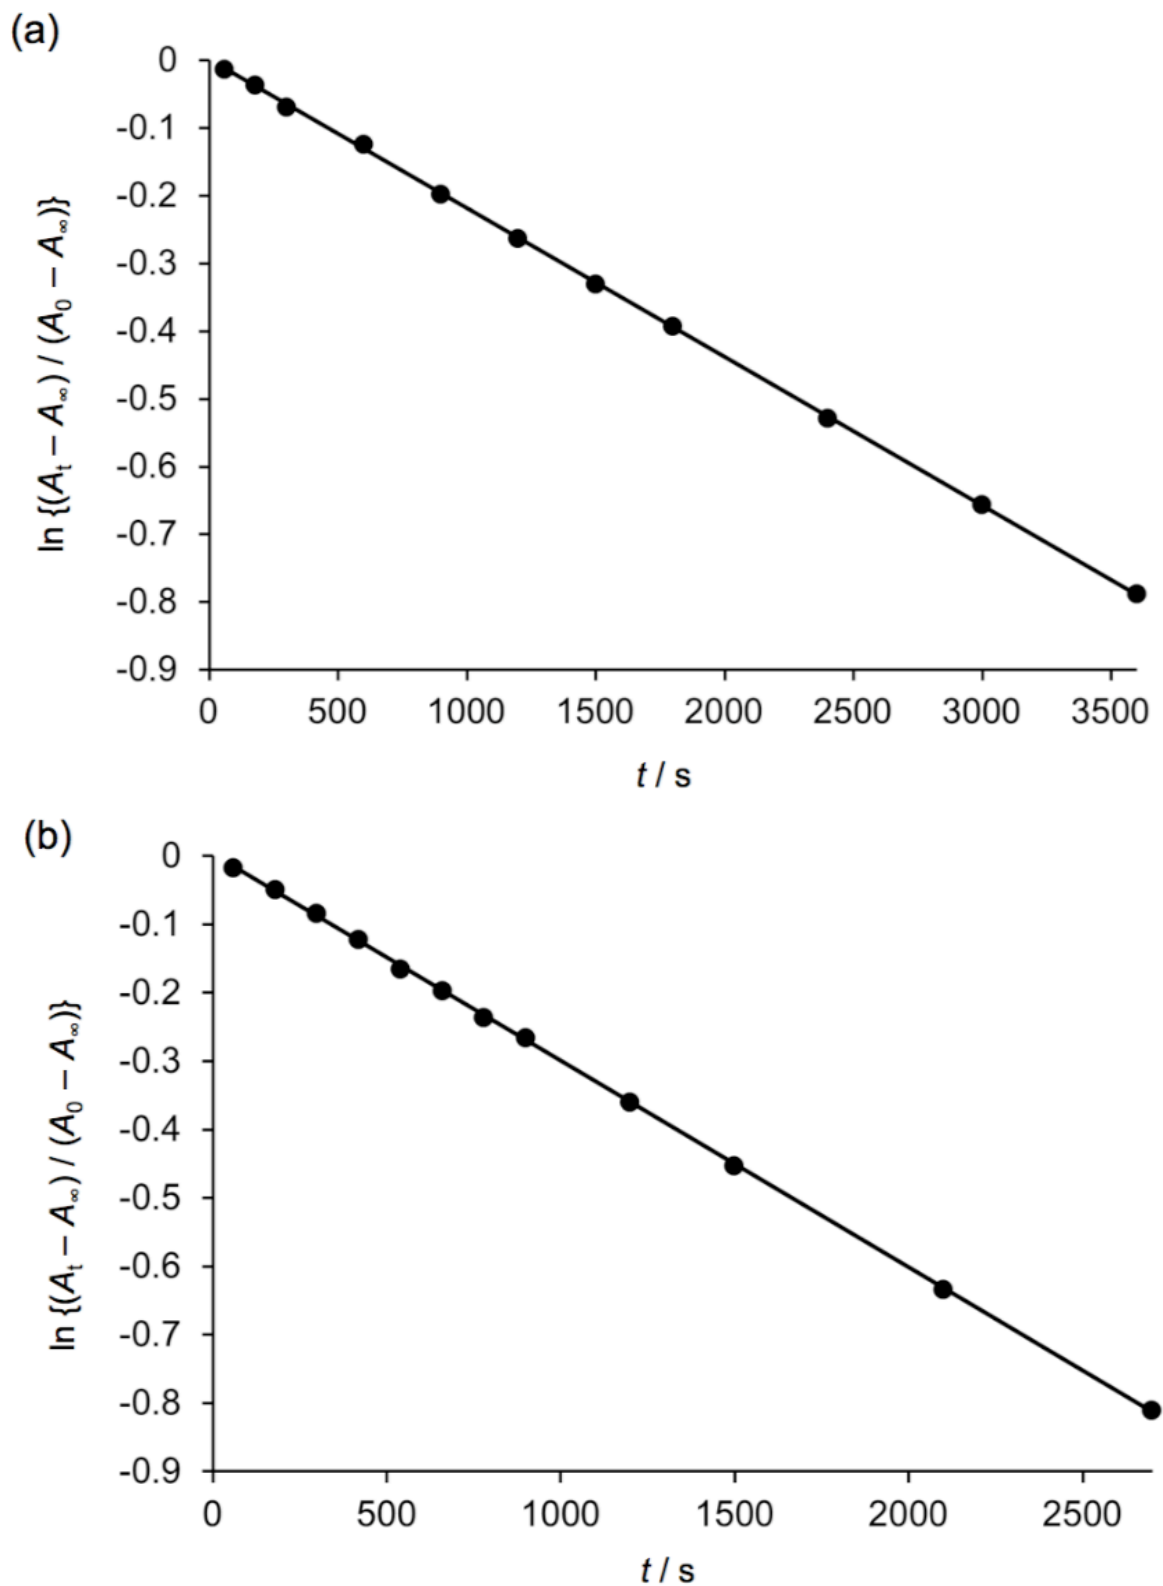

**Fig. S2** The first-order plots for photodissociation of CO from (a) **2a** and (b) **3a** in  $\text{CH}_3\text{CN}$ .

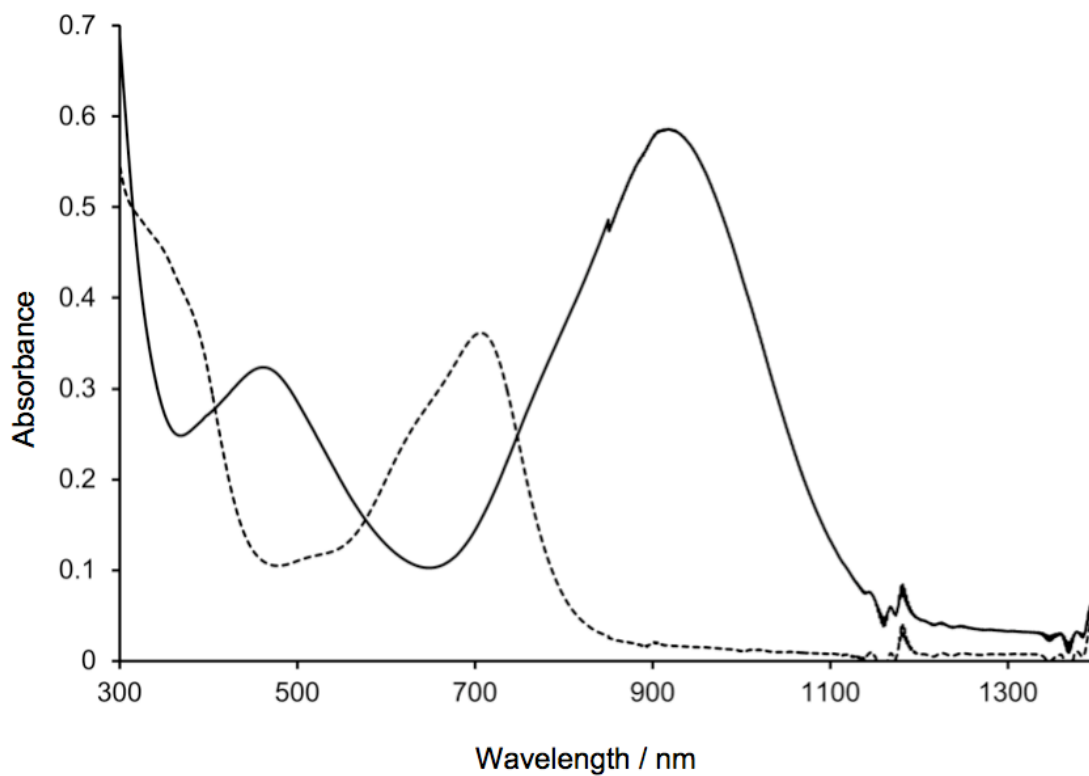

**Fig. S3** UV/vis and near IR spectra of **2a'** (solid line) and **[2a']<sup>2+</sup>** (broken line). The latter was *in situ* prepared by addition of  $\text{NH}_4\text{PF}_6$  to the solution of **2a'** in an optical cell (1-mm path length) in air.

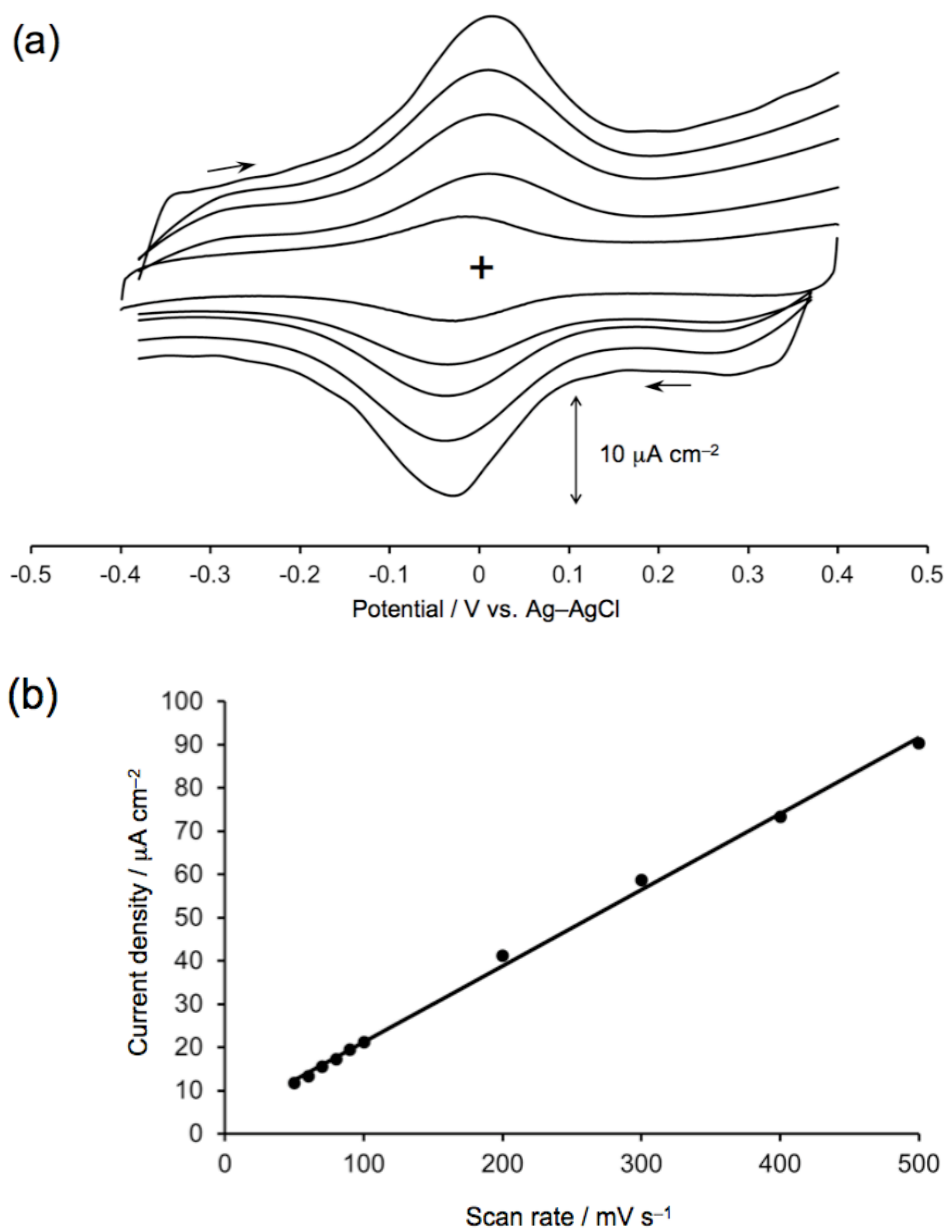

**Fig. S4** (a) Scan rate dependence of CVs of an Au(111) working electrode covered with **2a**/pmla SAMs after the treatment of electrochemical multiple potential cycles. Counter electrode: a Pt coil. Reference electrode: Ag-AgCl. Electrolyte solution: an aqueous solution of HClO<sub>4</sub> (0.1 M). Scan rate: 0.1, 0.2, 0.3, 0.4 and 0.5 V s<sup>-1</sup>. (b) A linear relationship of current peak intensity with the scan rate.
